# Supplementary material for: Condition-specific gene co-expression network mining identifies key pathways and regulators in the brain tissue of Alzheimer’s disease patients
Source: PubMed Central journal article supplement (PMC6311927; doi:10.1186/s12920-018-0431-1), 2018-12-31

# Ratios of Overlap to Original Modules

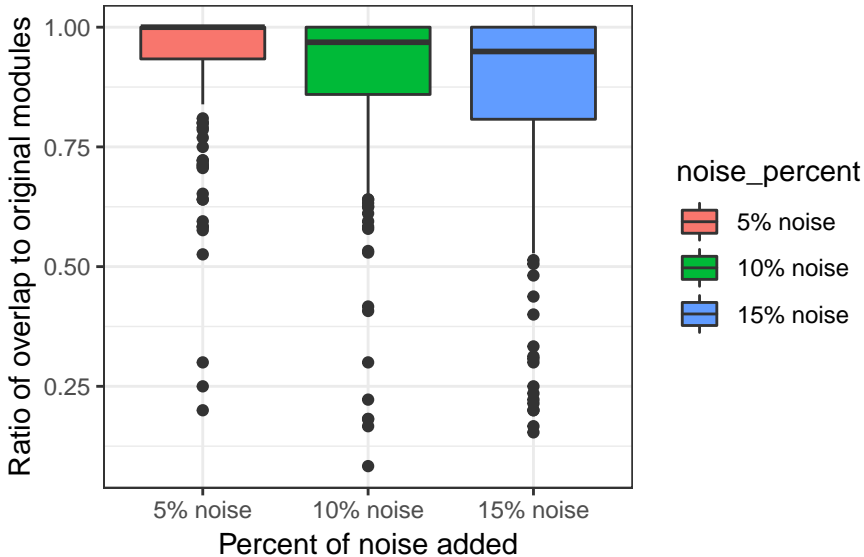

Supplement: 12920_2018_431_MOESM2_ESM.pdf [file 12920_2018_431_MOESM2_ESM.pdf]
